# Supplementary material for: Unusual selective substitution of triply bridging carbonyl ligands for GaCp* in Rh6(CO)16. Synthesis and structural characterization of the Rh6(μ3-CO)4 −x(μ3-GaCp*)x(CO)12 clusters, x = 1–4
Source: Royal Society of Chemistry journal article supplement (doi:10.1039/b109327d), 2002-01-01
Supplement: b109327d.doc [file b109327d.doc]

“ Unusual Selective Substitution of Triply Bridging Carbonyl Ligands for GaCp* in Rh6(CO)16. Synthesis and Structural Characterization of the Rh6(-CO)4-x(-GaCp*)x(CO)12 clusters, x=1-4.” Elena V.Grachova, Peter Jutzi,* Beate Neumann, Lars O. Schebaum, Hans-Georg Stammler, Sergey P.Tunik,*

**Supporting Materials.**

# Experimental

### **General comments**

The starting clusters Rh6(CO)16 was synthesized by refluxing of Rh4(CO)12 in hexane for 4-5 hours. The initially dark red solution of the tetranuclear cluster turned light brown and a black crystalline powder of Rh6(CO)16 precipitated in approximately quantitative yield. The clusters Rh4(CO)121, Rh6(CO)15(NCMe)2 and GaCp*3 were synthesized as described earlier.

All operations were performed under dry nitrogen atmosphere using standard Schlenk techniques. The products obtained were purified by column chromatography using Silica gel (Merck) 0.063 mm. Commercial dichloromethane, hexane and heptane (Merck; Vekton) were used as received. Chloroform, acetonitrile, tetrahydrofuran (Merck; Vekton) were distilled over appropriate drying agents under an atmosphere of nitrogen immediately before use.

Infrared spectra were recorded using a Bruker Vector 22-FT and Specord M80 spectrophotometers. Mass spectrometry was performed using a VG Autospec instrument in the ESI mode. The isotopic distribution patterns observed in the mass spectra fit completely to the calculated ones. The 1H and 13C{1H} NMR spectra were recorded in d1-chloroform using Bruker Avance DRX-500 and DPX-300 instruments. Chemical shifts are reported in ppm and referenced to TMS as an internal standard.

***Synthesis of Rh6(CO)12(3-CO)3(3-GaCp*) (1) and Rh6(CO)12(3-CO)2(3-GaCp*)2 (2).***

Rh6(CO)15NCMe (30 mg, 0.028 mmol) was dissolved in 20 ml of THF. The mixture was degassed and a solution of the GaCp* (6.25 mg, 0.031 mmol) in THF was added under stirring. The TLC spot test showed reaction completion in 15 minutes. The solvent was then removed under *vacuo* and residue was dissolved in the dichloromethane/hexane = 1/10 mixture. Column chromatography workup, eluant dichloromethane/hexane = 1/9, gave the following bands in the order of elution: trace amount of (Rh6(CO)16), a brown band of **1**, a green-grey band of **2** and ligth brown band containing an unidentified compound. Addition of heptane and removal of the solvent under *vacuo* afforded crystalline powders of **1** (3 mg, 14%) and **2** (16 mg, 71%). **(1)** **H(CDCl3) 2.23(s, Cp* methyl); **C(CDCl3) 10.94(Cp* methyl), 118.27(Cp* ring); max/ cm-1(CO)(Rel. Int.) 2100(20), 2064(100), 2048(46), 2028(10), 2004(5), 1778(22) (CHCl3); *m/z*: 1138 (M+Cl - 5CO), 1110 (M+Cl - 6CO), 1082 (M+Cl - 7CO), 1054 (M+Cl - 8CO), 1026 (M+Cl - 9CO); Single crystals of **(1)** suitable for X-ray analysis have been grown from CH2Cl2/hexane at 0°C.

**(2)** **H(CDCl3) 2.21(s, Cp* methyl); **C(CDCl3) 10.94(Cp* methyl), 118.70(Cp* ring); max/ cm-1(CO)(Rel. Int.) 2088(17), 2052(100), 2032(19), 2008(6), 1774(8); *m/z* 1342 (M+Cl - 4CO), 1286 (M+Cl - 6CO), 1258 (M+Cl - 7CO), 1138 (M+Cl - 4CO - 1GaCp*), 1110 (M+Cl - 5CO - 1GaCp*), 1082 (M+Cl - 6CO - 1GaCp*), 1054 (M+Cl - 7CO - 1GaCp*); Single crystals of **(2)** suitable for X-ray analysis have been grown from CH2Cl2/hexane at 0°C.

***Synthesis of Rh6(CO)12(3-CO)(3-GaCp*)3 (3) and Rh6(CO)12(3-GaCp*)4 (4)***

Rh6(CO)16 (20 mg, 0.019 mmol) was suspended in 20 ml of THF and a solution of the GaCp* (15.5 mg, 0.076 mmol) in THF (1 ml) was added under stirring. The reaction mixture quickly turned dark green. The reaction course was monitored by IR, which showed reaction completion in one hour. The solvent was removed under vacuo and residue was dissolved in the dichloromethane/hexane = 1/5 mixture. Column chromatography workup, eluant dichloromethane/hexane = 1/4, gave two green bands containing clusters **(4)** and **(3),** in the order of elution. Addition of heptane and removal of the solvent under vacuo afforded dark green crystalls of 3 (9 mg, 63%) and 4 (5 mg, 29 %). **(3)** H(CDCl3) 2.14(s, Cp* methyl); C(CDCl3) 10.74(Cp* methyl), 118.30(Cp* ring); max/ cm-1(CO)(Rel. Int.) 2088(3), 2064(27), 2038(100), 2018(38), 1993(11), 1768(9); *m/z* 1602 (M+Cl - 1CO), 1575 (M+Cl - 2CO), 1546 (M+Cl - 3CO), 1518 (M+Cl - 4CO), 1490 (M+Cl - 5CO), 1462 (M+Cl - 6CO); Single crystals of **3** suitable for X-ray analysis have been grown from CH2Cl2/hexane at 20°C. **(4)** H(CDCl3) 2.11(s, Cp* methyl); C(CDCl3) 10.83(Cp* methyl), 119.43(Cp* ring); max/ cm-1(CO)(Rel. Int.) 2028(100), 1988(6); *m/z* 1808 (M+Cl), 1780 (M+Cl - 1CO), 1612 (M+Cl - 7CO).

## References

1 S. Martinengo, P. Chini, *J. Organomet. Chem.*, 1971, **27**, 389.

2 S. P. Tunik, A. V. Vlasov, V. V. Krivykh, *Inorg. Synth.*, 1997, **31**, 239.

3 P. Jutzi, B. Neumann, G. Reumann, H.-G. Stammler, *Organometallics*, 1998, **17**, 1305.
